# Supplementary material for: Synthesis, characterization and C–H activation reactivity of bis(ethylene) boratabenzene rhodium complexes
Source: Royal Society of Chemistry journal article supplement (doi:10.1039/b009246k), 2001-01-01
Supplement: b009246k.doc [file b009246k.doc]

Synthesis, Characterization and C-H Activation Reactivity of Bis(ethylene)-boratabenzene Rhodium Complexes

# David H. Woodmansee, Xianhui Bu and Guillermo C. Bazan*

**Supplementary Materials**

**General Remarks.** All manipulations were carried out in an inert atmosphere of argon or nitrogen using standard glovebox and Schlenk techniques.[[1]](#endnote-2) The compounds (Cp*Rh(Cl)2)22, (Rh(Cl)[C­2H4])23, Li[C5H5-NMe2]4 and Li[C5H5B-Ph]5 were synthesized according to the published procedures. All ambient temperature 1H and 13C{1H} 1NMR spectra were acquired using a Varian Unity 400 spectrometer. Variable temperature 1H and 13C{1H} spectra were recorded with a Varian Unity 500 spectrometer. 1H and 13C{1H} spectra are referenced internally to the solvent resonances. 11B{1H} spectra were recorded on a Varian Unity 500 spectrometer and are referenced externally to BF3Et2O. C-H activation reactions were carried out as described by Hartwig.6

**Synthesis of [C5H5B-NMe2]-Rh(C2H4)2:** Lithium dimethylamino-boratabenzene (100 mg, 0.787 mmol, 2.5 eq) was dissolved in 5 mL of dry THF and added dropwise to a stirring solution of [Rh(Cl)(C­2H4)2]­­2 (122.5 mg, 0.315 mmol, 1 eq) in 10 mL of THF. The flask was sealed and stirred overnight. The solvent was then removed under vacuum resulting in a red powder. The complex was extracted with 3 x 10 mL portions of pentane. The fractions were combined, filtered, and the pentane was removed under vacuum resulting in a fine red-orange powder (121mg, 85% yield). 1H NMR (295 K, C6D6, 400 MHz):  2.190 (broad, 8H,C­2H­4), 2.698 (s, 6H), 4.276 (tt, 1H, CHCHCHB, ­4J­HH = 0.8 Hz, 3J­HH = 5.3 Hz), 4.87 (dd, 2H, CHCHCHB, ­4J­HH = 0.8 Hz, 3J­HH = 9.3 Hz), 5.82 (dd, 2H, CHCHCHB, ­4J­HH = 5.3 Hz, 3J­HH = 9.3 Hz). 13C NMR (C6D6, 100 MHz):  38.86 , 43.1, 82.17, 109.1. 11B NMR (C6D6, 160 MHz):  22. Anal. Calcd. (C11H19BNRh): C, 47.35; H, 6.86; N, 5.02. Found: C, 47.35; H, 6.95; N, 5.14.

**Synthesis of [C5H5B-C6H5]Rh(C2H4)2:** The synthesis was carried out exactly as for BbNMe2-Rh(C2H4)2, yielding 91% as a light yellow crystalline solid. 1H NMR (295 K, C6D6, 400 MHz):  1.22 (broad, 4H, C­2H­4), 2.82 (broad, 4H, C­2H­4), 4.34 (tt, 1H, CHCHCHB, ­4J­HH = 1.1 Hz, 3J­HH = 5.5 Hz), 6.0 (m, 4H, CHCHCHB), 7.29 (tt, 1H, ­4J­HH = 1.46 Hz, 3J­HH = 7.3 Hz), 7.38 (tt, 2H, ­4J­HH = 1.28 Hz, 3J­HH = 7.0 Hz), (dd, 2H, ­4J­HH = 1.46 Hz, 3J­HH = 7.14 Hz).  13C NMR (C6D6, 100 MHz):  44.63, 44.75, 88.73, 104.463(broad), 109.89, 128.87, 133.94. 11B NMR (C6D6, 160 MHz):  21. Anal. Calcd. (C15H18BRh): C, 57.74; H, 5.82. Found: C, 57.70; H, 5.62.

## References

1. P.M. Maitlis, K. Moseley, J.W. Kang, *J. Chem. Soc. A* (1970), 2875.
2. C. White, A. Yates, P.M. Maitlis, D.M. Heinekey, *Inorg. Synth.* **29** (1992), 228.
3. R. Cramer, *Inorg. Chem.* **1**, 772 (1962).
4. Qiao, S.; Hoic, D. A.; Fu, G. C. *J. Am. Chem. Soc.* **118**, (1996), 2291.
5. Ashe, A. J., III; Shu, P. *J. Am. Chem. Soc.* **93** (1971), 1804.
6. Chen, H.; Schlecht, S.; Semple, T. C.; Hartwig, J. F. *Science* **287**, (2000), 1995.

1. . Burger, B. J.; Bercaw, J. E. In *Experimental Organometallic Chemistry*; Wayda, A. L., Darensbourg, M. Y. Eds.; ACS Symposium Series 357; American Chemical Society, Washington D. C. **1987**. [↑](#endnote-ref-2)
